# Supplementary material for: Modeling Solid-Phase Microextraction of Volatile Organic Compounds by Porous Coatings Using Finite Element Analysis
Source: Preprints.org preprint supplement (doi:10.20944/preprints201901.0321.v2), 2019-04-23
Supplement: Supplementary file 1 [file supplementary]

## Supplementary Material

### Modeling solid-phase microextraction of volatile organic compounds by porous coatings using finite element analysis

Bulat Kenessov <sup>1,\*</sup>, Miras Derbissalin <sup>1</sup>, Jacek A. Koziel <sup>2</sup>, Dmitry S. Kosyakov<sup>3</sup>

<sup>1</sup>Center of Physical Chemical Methods of Research and Analysis, Faculty of Chemistry and Chemical Technology, Al-Farabi Kazakh National University, 050012 Almaty, Kazakhstan, [bkenesov@cfhma.kz](mailto:bkenesov@cfhma.kz) (ORCID: 0000-0001-8541-0903), [derbissalin@cfhma.kz](mailto:derbissalin@cfhma.kz) (ORCID: 0000-0001-6928-971X).

<sup>2</sup>Department of Agricultural and Biosystems Engineering, Iowa State University, Ames, IA, USA, [koziel@iastate.edu](mailto:koziel@iastate.edu) (ORCID: 0000-0002-2387-0354)

<sup>3</sup>Core Facility Center “Arktika”, Northern (Arctic) Federal University, Arkhangelsk, Russia, [d.kosyakov@narfu.ru](mailto:d.kosyakov@narfu.ru) (ORCID: 0000-0001-5223-6857)

\* – Corresponding author, 050012 Almaty, 96a Tole bi Street, room 403, Kazakhstan, tel: +7 727 2390624; fax: +7 727 2923731; e-mail: [bkenesov@cfhma.kz](mailto:bkenesov@cfhma.kz).

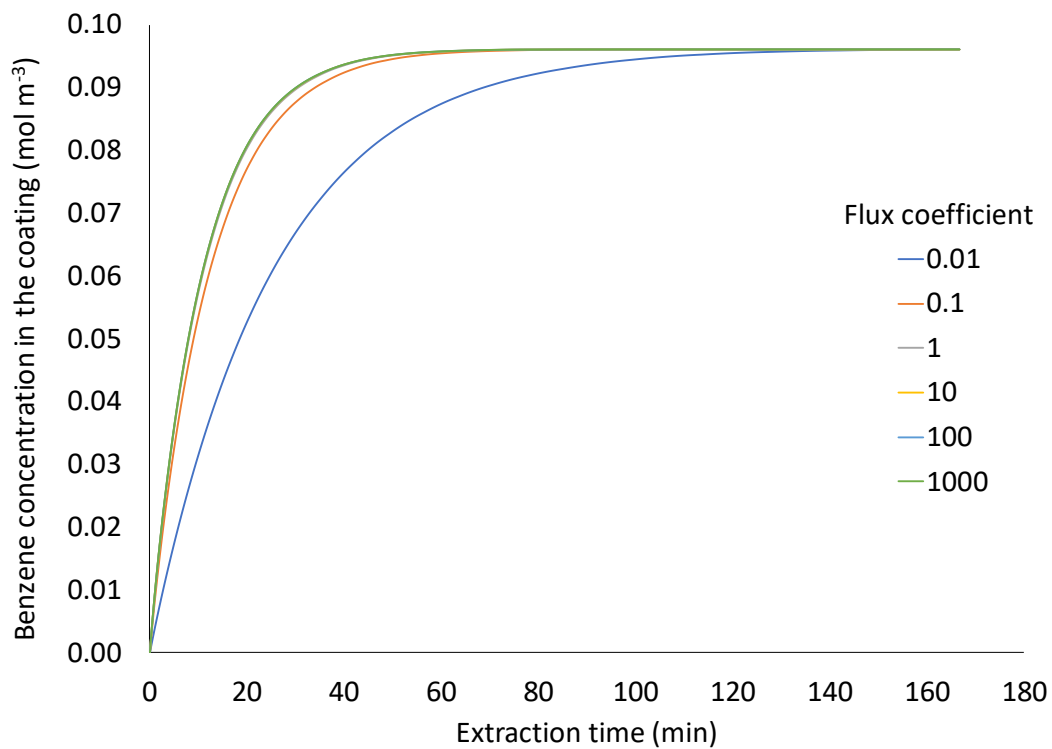

**Fig. A.1** Benzene extraction profiles from air with Carboxen/PDMS fiber obtained using ‘Transport of Diluted Species’ physics and different flux coefficients ( $k$ ). Note: apparent benzene diffusion coefficient in the coating =  $10^{-11} \text{ m}^2 \text{ s}^{-1}$ .

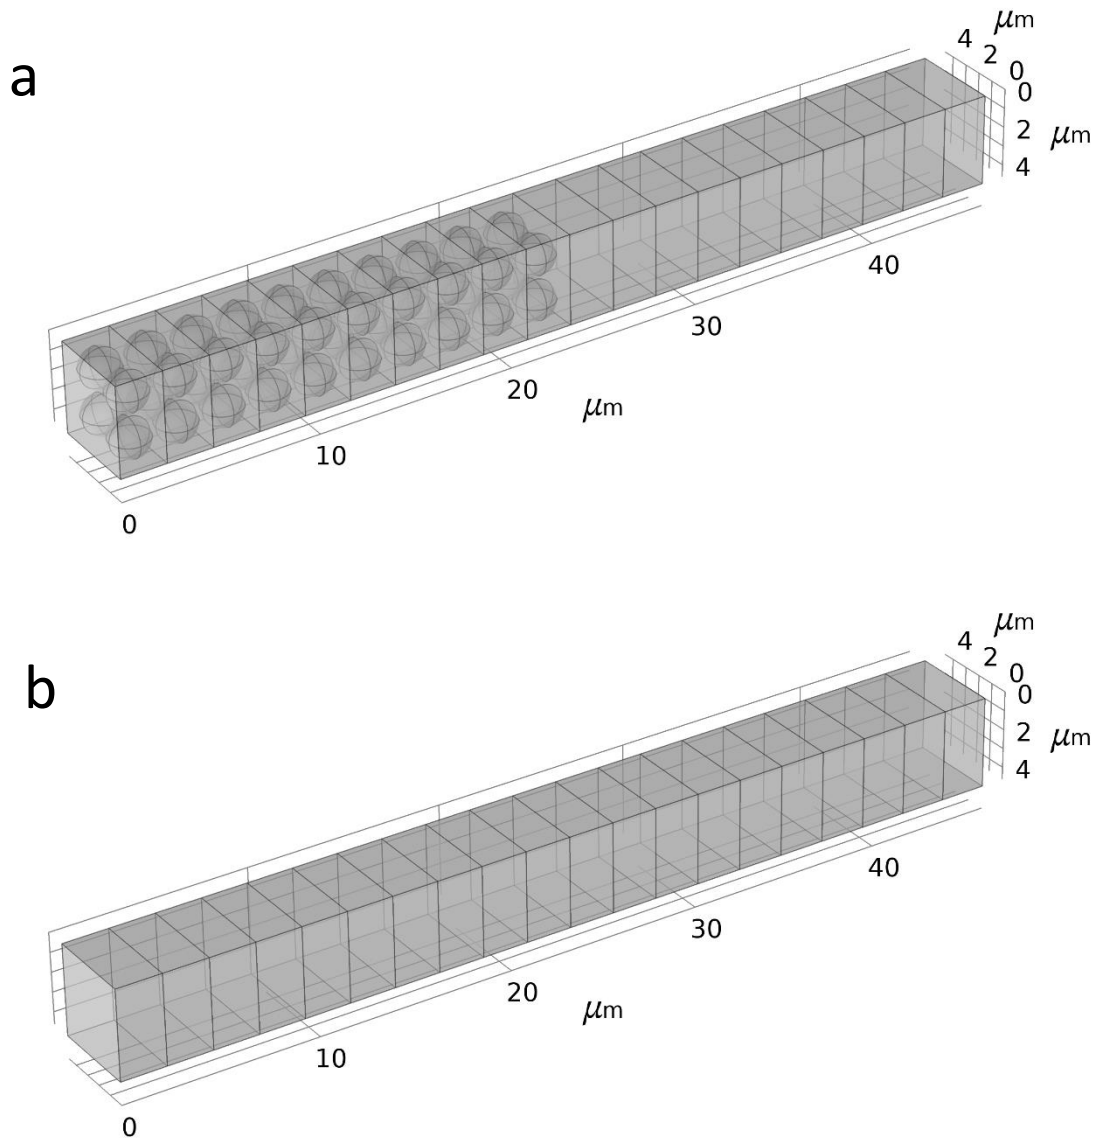

**Fig. A.2** Three-dimensional geometries with particles (a) and without particles (b) used to study mass transport of benzene in a cuboid of Car/PDMS coating. *Note:* Ten small blocks from the right side represent air; ten small blocks from the left side represent the ‘slice’ of coating. Constant benzene concentration of  $0.641 \mu\text{mol m}^{-3}$  was set at the right edge of the geometry. Initial concentrations in the remaining parts of the geometry was set to zero.

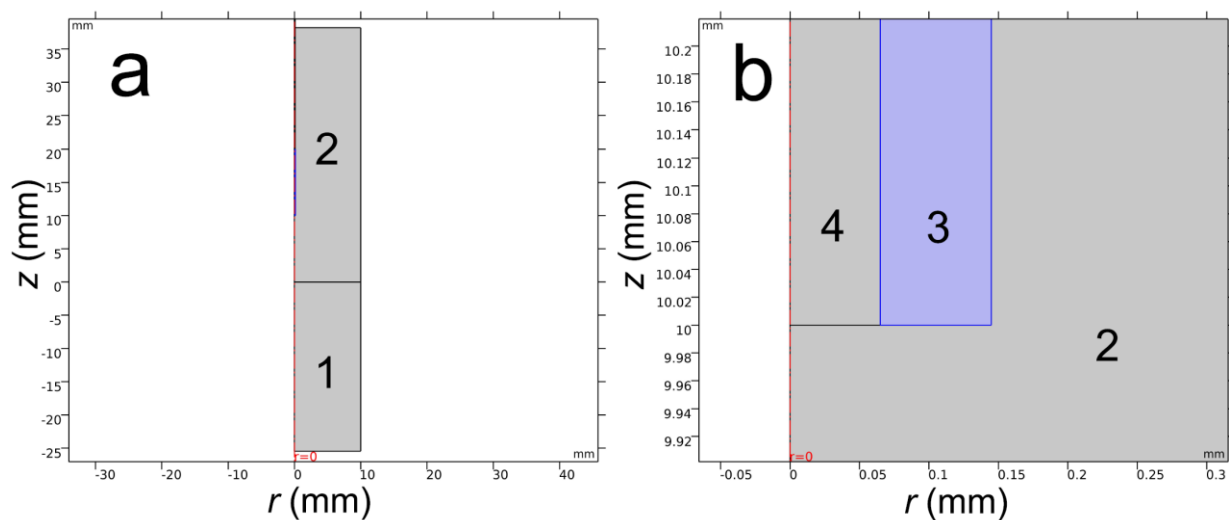

**Fig. A.3** Geometry used to model extraction of benzene from water by exposed Car/PDMS fiber.

*Note:* a – full-scale geometry; b – magnified fiber tip; 1 – water sample with initial benzene concentration  $0.641 \text{ mmol m}^{-3}$ ; 2 – headspace above water sample ( $C_0 = 0 \text{ mol m}^{-3}$ ); 3 – coating; 4 – fiber core.

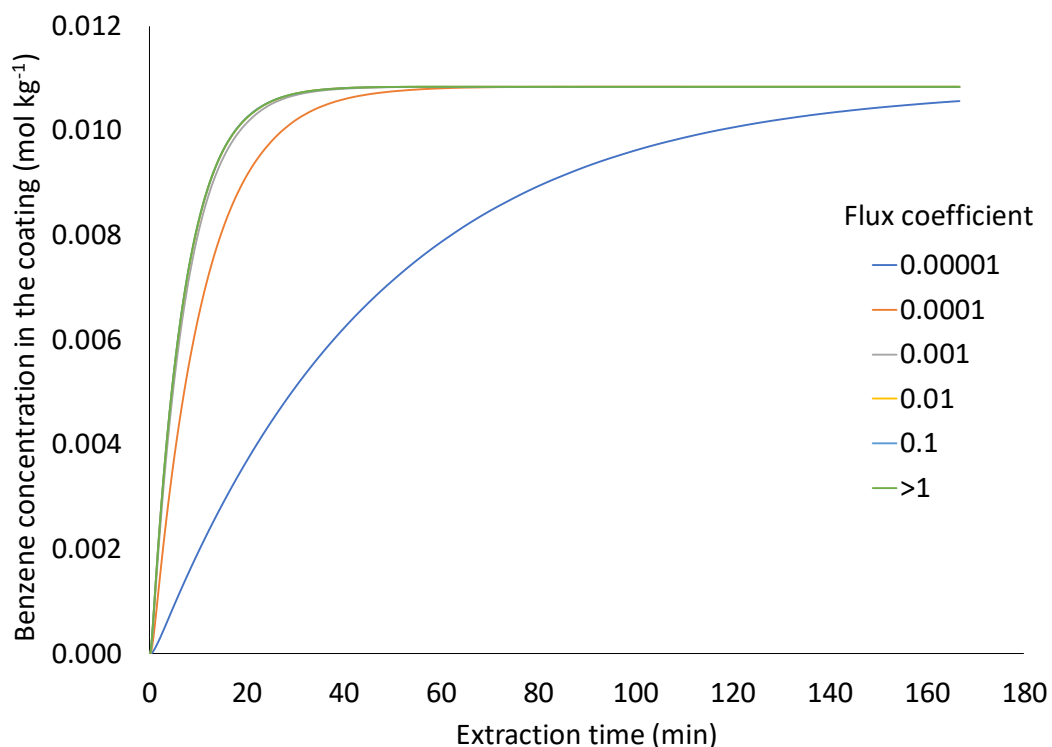

**Fig. A.4** Benzene extraction profiles from headspace above 12-mL water sample with Carboxen/PDMS fiber obtained using different water-headspace flux coefficients ( $k$ ). *Note:* HLC = 0.227.

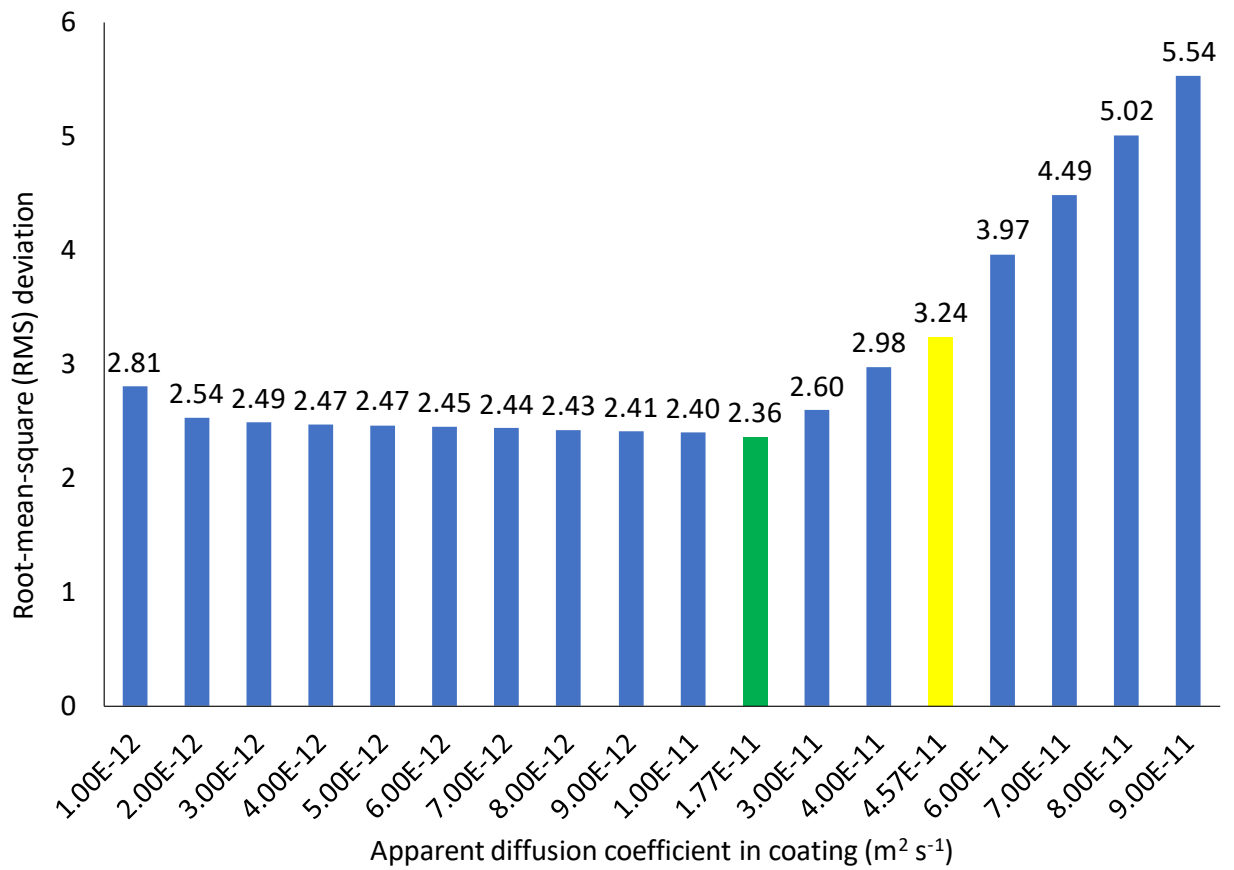

**Fig. A.5** RMS deviations obtained at different apparent diffusion coefficients. Notes: green bar represents the case when PDMS is considered as a solid phase; yellow bar represents the case when PDMS is considered as air.

## Modeling parameters ready for import to COMSOL Multiphysics

*For import to COMSOL Multiphysics software, these parameters should be copied to .txt file.*

### Modeling parameters for obtaining Fig. 3:

KfaB 150000 "Dimensionless distribution constant between coating and air"

CoreD 0.13[mm] "Fiber core diameter"

CoatTh 0.08[mm] "Coating thickness"

Cini 6.41e-7[mol/m<sup>3</sup>] "Initial benzene concentration in air"

DiffCbA 8.8E-6[m<sup>2</sup>/s] "Diffusion coefficient in air"

FluxC 1000[m/s] "Flux coefficient"

DiffCbAcE 1e-11[m<sup>2</sup>/s] "Apparent diffusion coefficient in coating"

VialD 20[mm] "Diameter of vial"

VialV 20[ml] "Volume of vial"

VialH  $VialV * 4 / \pi / VialD^2$  "Height of vial"

### Modeling parameters for obtaining Fig. 6 (geometry without particles):

PartV .33 "Volumetric fraction of particles"

PartPor 0.37 "Porosity of particles"

PartDen 1000[kg/m<sup>3</sup>] "Density of particles"

Kd1 Kd/CoatDen "Distribution constant between coating and air"

Kd 150000 "Dimensionless distribution constant between coating and air"

DiffCa 8.8e-6[m<sup>2</sup>/s] "Diffusion coefficient in air"

CoatTort  $CoatPor + 1.5 * (1 - CoatPor)$  "Coating tortuosity"

CoatPor  $1 - PartV + PartV * PartPor$  "Coating porosity"

CoatDen  $PartDen * PartV$  "Coating density"

**Modeling parameters for obtaining Fig. 7:**

DiffCa  $8.8e-6$ [m<sup>2</sup>/s] "Diffusion coefficient in air"

Kfa 150000 "Dimensionless distribution constant between coating and air"

PartV 0.33 "Volumetric fraction of particles"

Kfa1  $Kfa/CoatDen$  "Distribution constant between coating and air"

PartPor 0.37 "Porosity of Particles"

PartTort  $PartPor+1.5*(1-PartPor)$  "Tortuosity Factor of Particles"

DiffCk  $1.123e-7$ [m<sup>2</sup>/s] "Knudsen diffusion coefficient in pores"

PartR  $1E-6$ [m] "Radius of particles"

PartDen  $1000$ [kg/m<sup>3</sup>] "Density of particles"

CoatDen  $PartDen*PartV$  "Density of coating"

### Modeling parameters for obtaining Fig. 8:

Cini  $6.41e-7$ [mol/m<sup>3</sup>] "Initial concentration in air"

CoatDen PartDen\*(1-InterPartPor) "Coating density"

CoatPor InterPartPor+PartPor\*(1-InterPartPor-PDMS) "Coating porosity"

CoatTh 0.08[mm] "Coating thickness"

CoatTort CoatPor+1.5\*(1-CoatPor) "Coating tortuosity factor"

CoreD .13[mm] "Fiber core diameter"

DiffCbA  $8.8E-6$ [m<sup>2</sup>/s] "Diffusion coefficient in air"

DiffCbAc  $8.8e-6$ [m<sup>2</sup>/s] "Diffusion coefficient in air inside pores"

FiberL 10[mm] "Fiber length"

InterPartPor .24 "Inter-particle porosity"

Kfa1 KfaB/CoatDen "Distribution constant between coating and air"

KfaB 150000 "Dimensionless distribution constant between coating and air"

PartDen 1000[kg/m<sup>3</sup>] "Density of particles"

PartPor 0.37 "Porosity of particles"

PDMS 0.42 "Fraction of PDMS"

VialD 20[mm] "Diameter of vial"

VialH  $VialV*4/pi/VialD^2$  "Height of vial"

VialV 20[ml] "Volume of vial"



### Modeling parameters for obtaining Fig. 9:

KfaB 150000 "Dimensionless benzene distribution constant between fiber and air"

CoreD 0.13[mm] "Diameter of fiber core"

CoatTh 0.08[mm] "Coating thickness"

PartPor 0.37 "Porosity of particles"

PartDen 1000[kg/m<sup>3</sup>] "Density of particles"

InterPartPor 0.24 "Inter-particle porosity"

CoatPor InterPartPor+PartPor\*(1-InterPartPor-PDMS) "Total coating porosity"

CoatDen PartDen\*(1-InterPartPor) "Coating density"

KfaB1 KfaB/CoatDen "Benzene distribution constant between fiber and air"

CoatTort CoatPor+1.5\*(1-CoatPor) "Coating tortuosity"

DiffCbA 8.8E-6[m<sup>2</sup>/s] "Benzene diffusion coefficient in air"

VialV 20[ml] "Vial volume"

VialD 20[mm] "Vial diameter"

VialH VialV\*4/pi/VialD<sup>2</sup> "Vial height"

FiberL 10[mm] "Fiber length"

WaterV "12 [ml]" "Water volume"

WaterH WaterV\*4/pi/VialD<sup>2</sup> "Water height"

HSH VialH-WaterH "Headspace height"

FiberH 10[mm] "Fiber height"

HLC 0.227 "Henry's law constant"

CiniW 6.41e-7[mol/l] "Initial benzene concentration in water"

FluxC 1000[m/s] "Flux coefficient"

PDMS 0.42 "PDMS fraction"
